# Supplementary material for: Electrochemical Reduction of CO2 to C1 and C2 Liquid Products on Copper-Decorated Nitrogen-Doped Carbon Nanosheets
Source: MDPI journal article supplement (doi:10.3390/nano13010047), 2022-12-22
Supplement: s1 [file s1]

Supplementary Materials

# Electrochemical Reduction of CO<sub>2</sub> to C1 and C2 Liquid Products on Copper-Decorated Nitrogen-Doped Carbon Nanosheets

Munzir H. Suliman, Zain H. Yamani and Muhammad Usman \*

Interdisciplinary Research Center for Hydrogen and Energy Storage (IRC-HES), King Fahd University of Petroleum & Minerals (KFUPM), Dhahran 31261, Saudi Arabia

\* Correspondence: muhammadu@kfupm.edu.sa

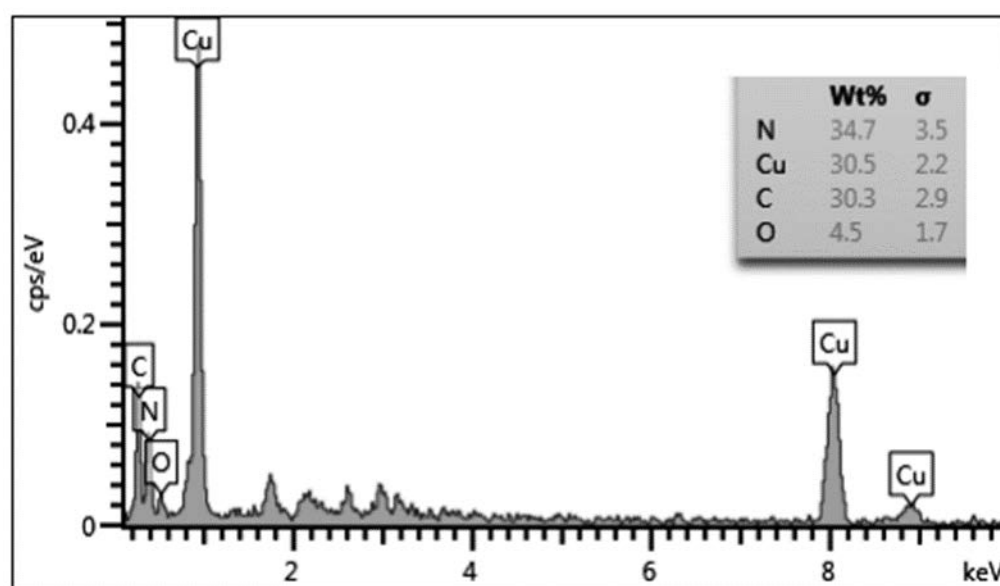

Figure S1. EDS of Cu/NC-700.

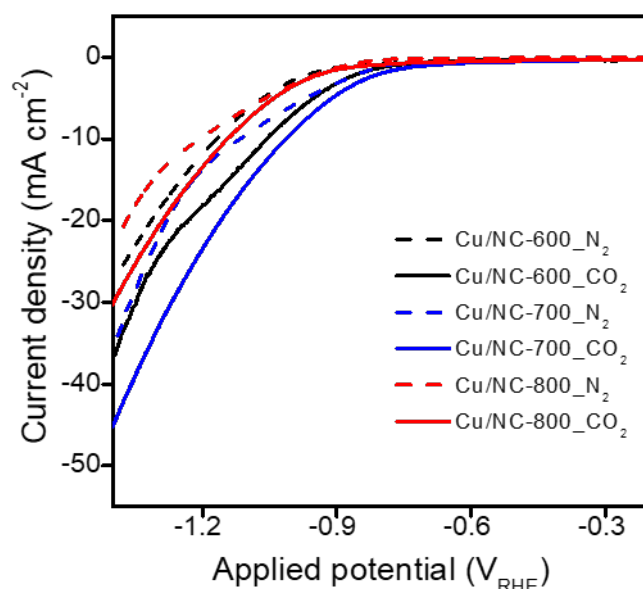

**Figure S2.** LSV curves of Cu-NP/NC electrocatalysts in N<sub>2</sub> and CO<sub>2</sub> saturated 0.5 M KHCO<sub>3</sub> electrolyte.

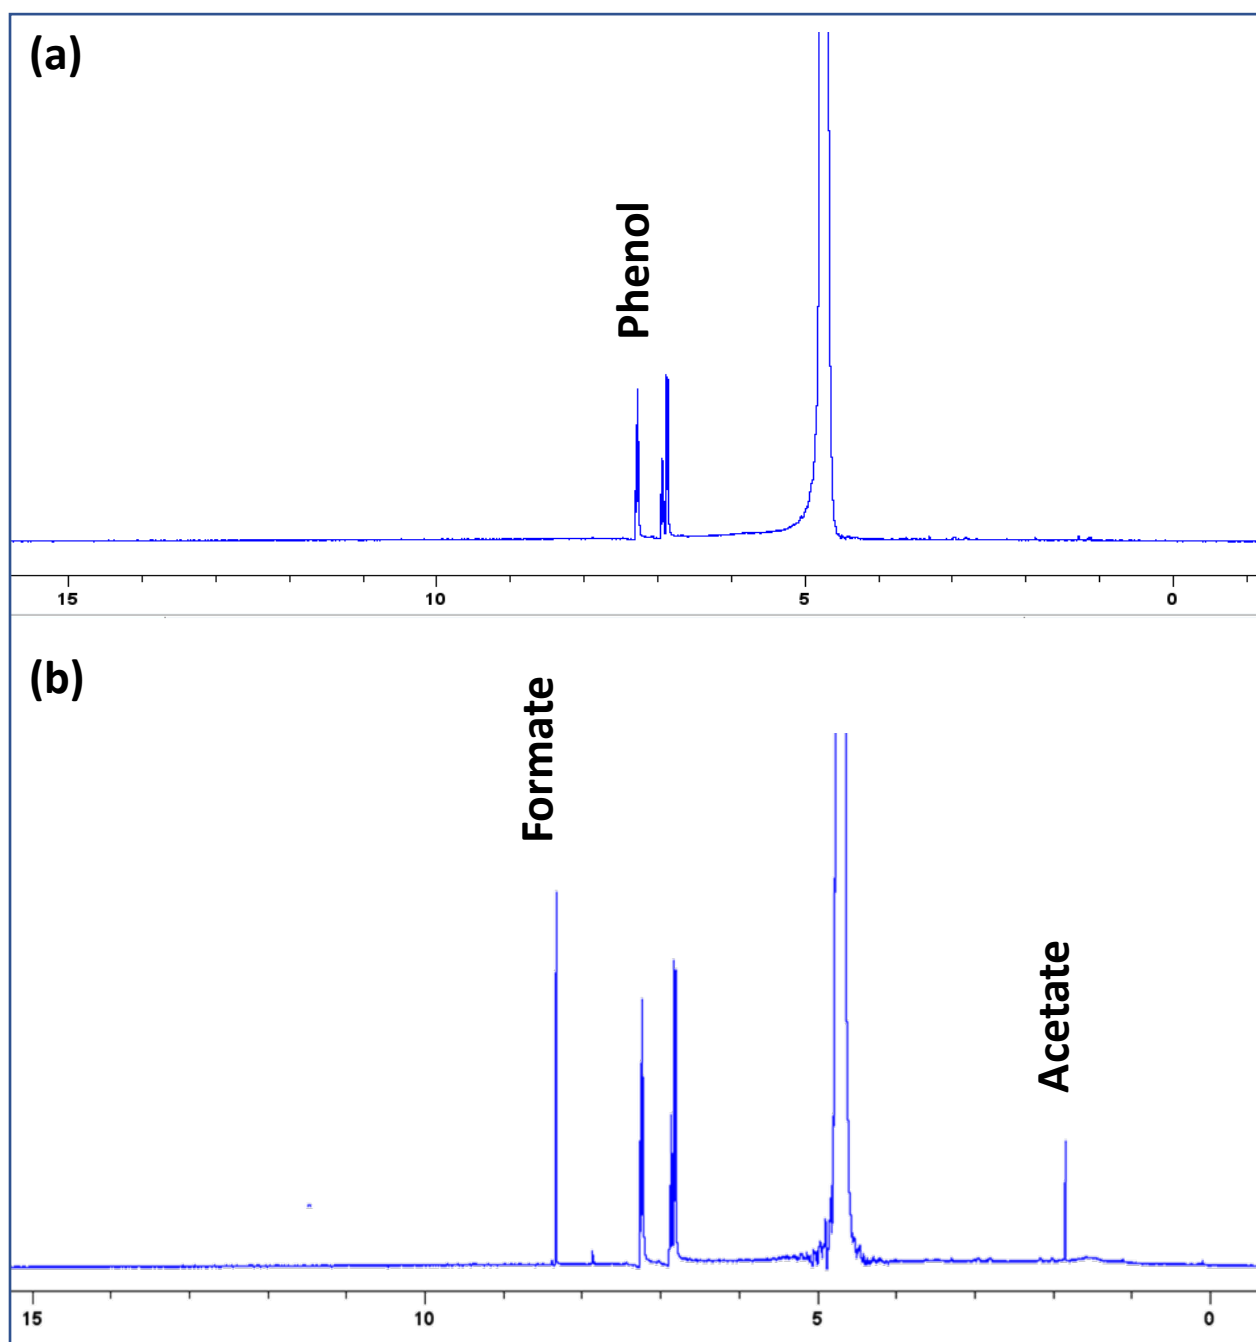

**Figure S3.** (a) Comparative NMR spectra for the blank electrolyte sample with the internal standard & D<sub>2</sub>O and (b) the sample after the chrono for 2 h at -0.8V<sub>RHE</sub> with the internal standard & D<sub>2</sub>O.
